# Supplementary material
Source: Preprints.org preprint supplement (doi:10.20944/preprints202101.0348.v1)
Supplement: Supplementary file 1 [file supplementary]

**Supporting Information for**

**Work function tuning in hydrothermally synthesized vanadium-doped MoO3 and Co3O4 mesostructures for energy conversion devices**

Pietro Dalle Feste1,2#,Matteo Crisci,1,3# Federico Barbon,1 Marco Salerno,4 Filippo Drago,5 Mirko Prato,4 Silvia Gross,1,2,6* Teresa Gatti,3,7* Francesco Lamberti1,2*

1 Department of Chemical Sciences, University of Padova, via Marzolo 1, 35131 Padova, Italy

2 Interdepartmental Centre Giorgio Levi Cases for Energy Economics and Technology, University of Padova, via Marzolo 9, 35131 Padova, Italy

3 Institute of Physical Chemistry, Justus Liebig University Giessen, 35390 Giessen, Germany

4 Materials Characterization Facility, Italian Institute of Technology, via Morego 30, 16163 Genova, Italy

5 Nanochemistry, Italian Institute of Technology, Via Morego 30, 16163 Genova, Italy

6 Karlsruher Institut für Technologie (KIT), Institut für Technische Chemie und Polymerchemie (ITCP), Engesserstr. 20, 76131 Karlsruhe, Germany

7 Center for Materials Research, Justus Liebig University Giessen, Heinrich Buff Ring 17, 35390 Giessen, Germany

* e-mail: [silvia.gross@unipd.it](mailto:silvia.gross@unipd.it) ; [teresa.gatti@phys.chemie.uni-giessen.de](mailto:teresa.gatti@phys.chemie.uni-giessen.de) ; [francesco.lamberti@unipd.it](mailto:francesco.lamberti@unipd.it)

# These two authors contributed equally


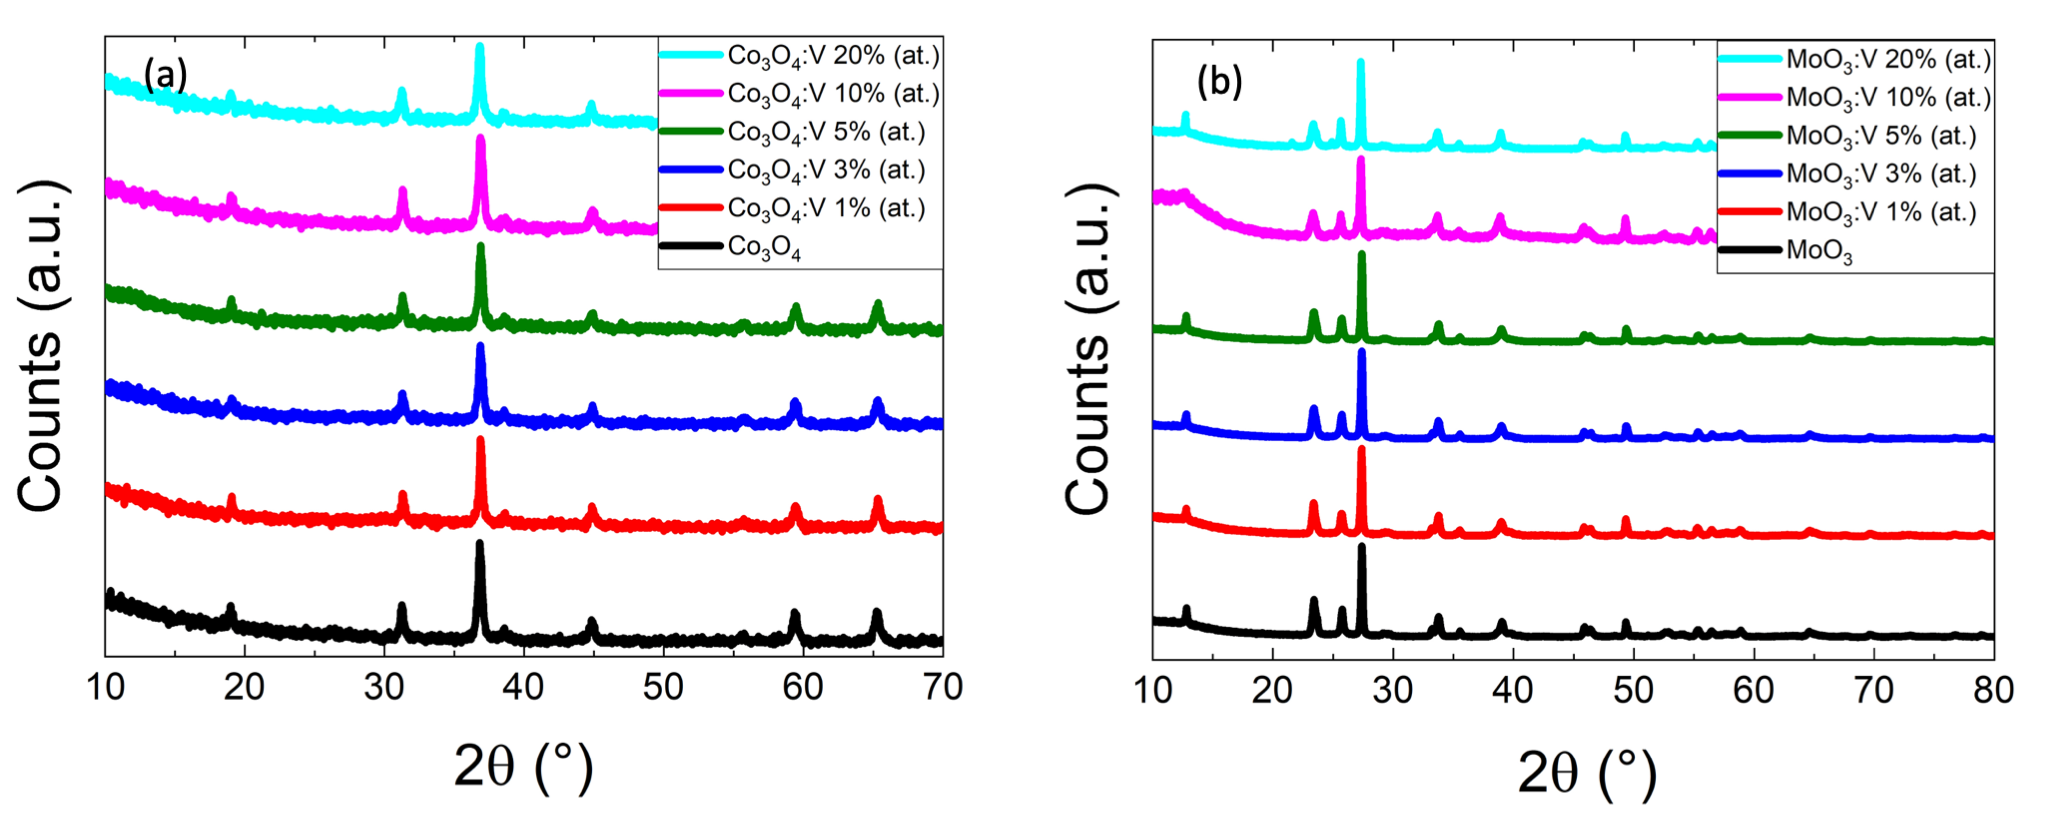


**Figure S1**. Diffractograms of a) Co3O4-related compounds and b) MoO3-doped samples.


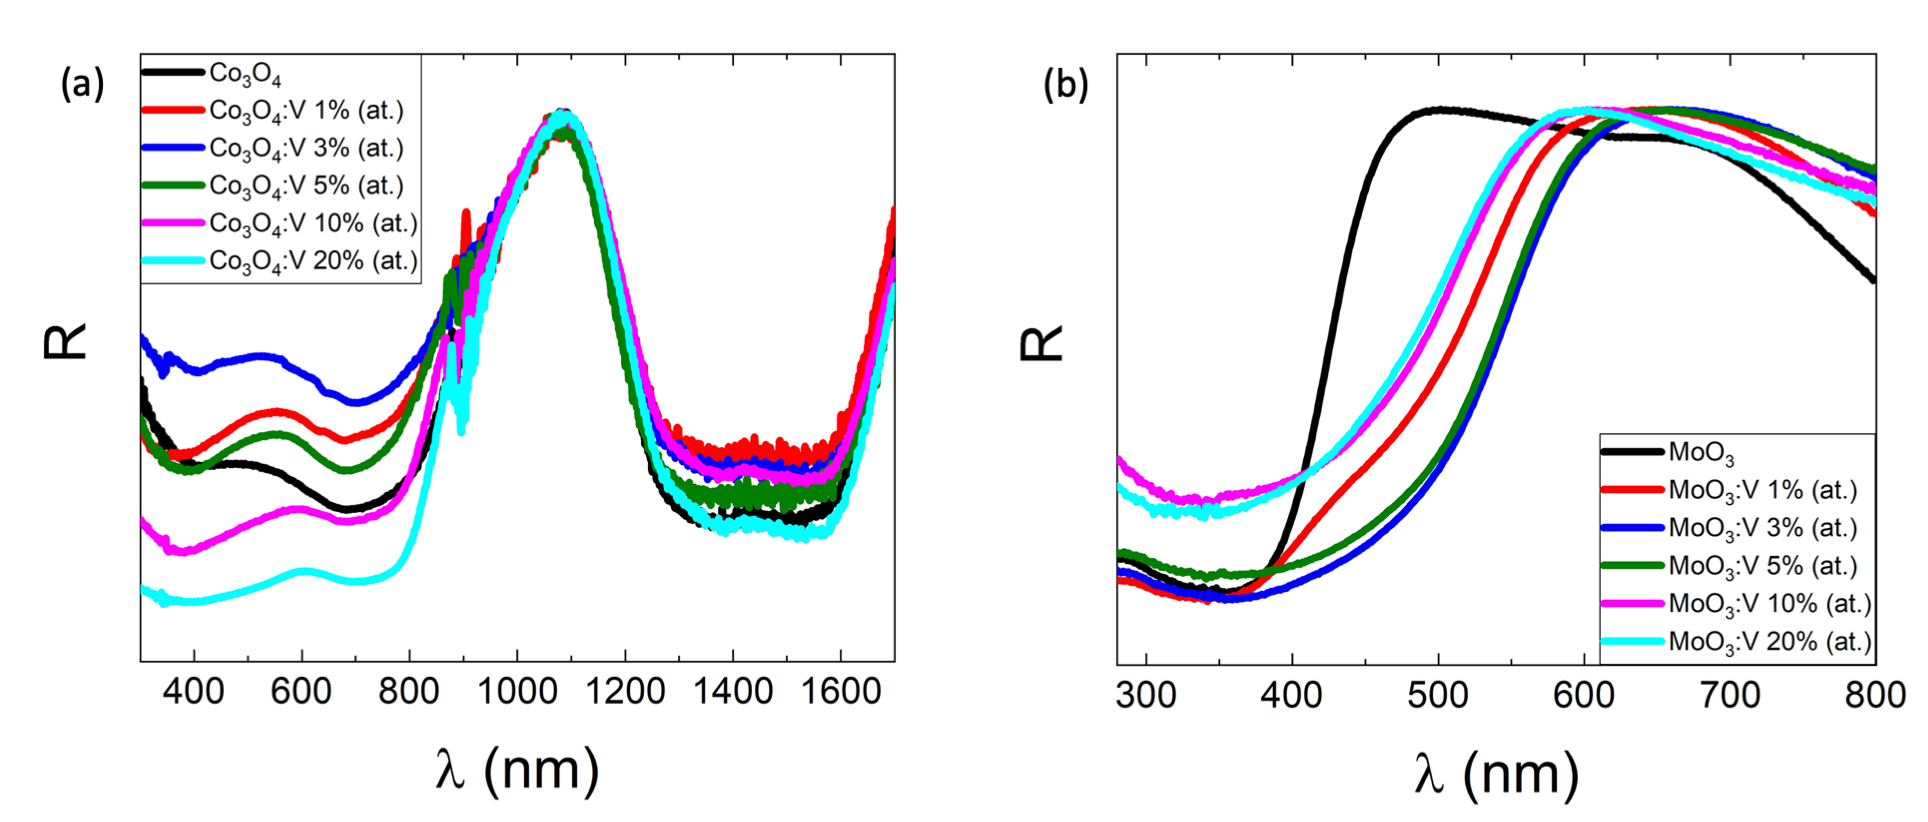


**Figure S2**. Reflectance spectra of a) Co3O4-related compounds and b) MoO3-doped samples used for Tauc plot analysis.

b)

a)

**Figure S3**. Diffractogram and corresponding Pawley refinement of undoped a) Co3O4 (Rwp = 9.27 %) and b) MoO3 (Rwp = 9.41 %)
